# Supplementary figures and images for: Rapid transporter regulation prevents substrate flow traffic jams in boron transport
Source: eLife journal article supplement (doi:10.7554/elife.27038), 2017-08-25

**A**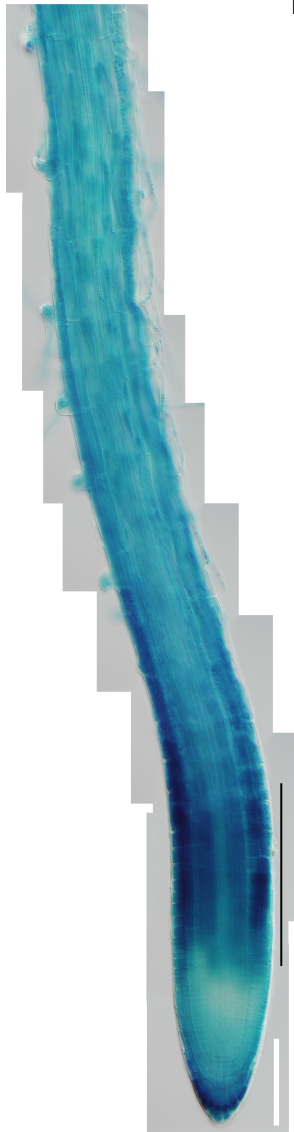**B**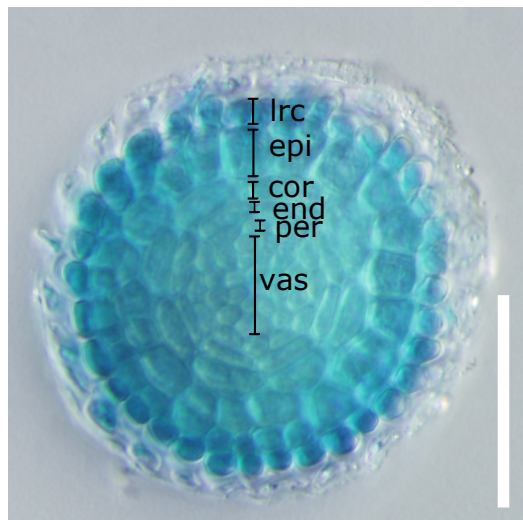

Supplement: supp [file elife_poa_e27038_Figure_1_figure_supplement_1.pdf › elife_poa_e27038_Figure_1_figure_supplement_1.pdf]

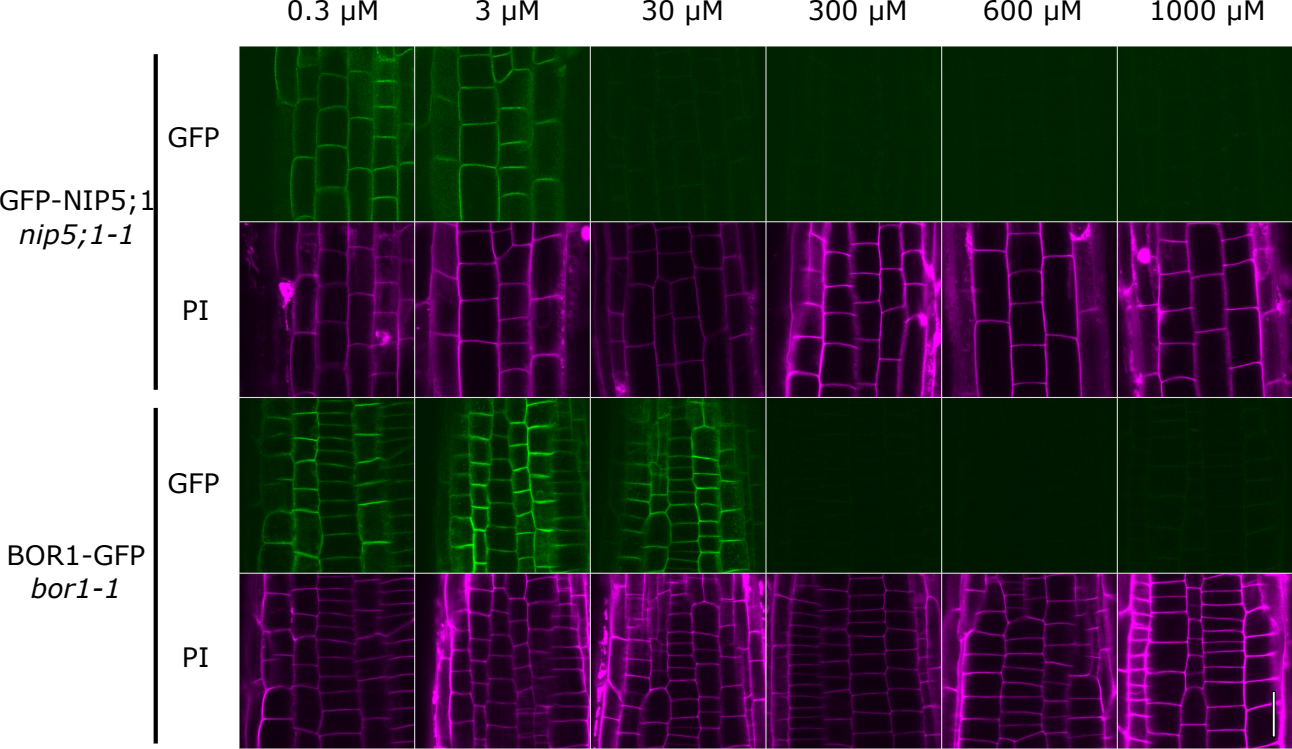

Supplement: supp [file elife_poa_e27038_Figure_1_figure_supplement_2.pdf › elife_poa_e27038_Figure_1_figure_supplement_2.pdf]

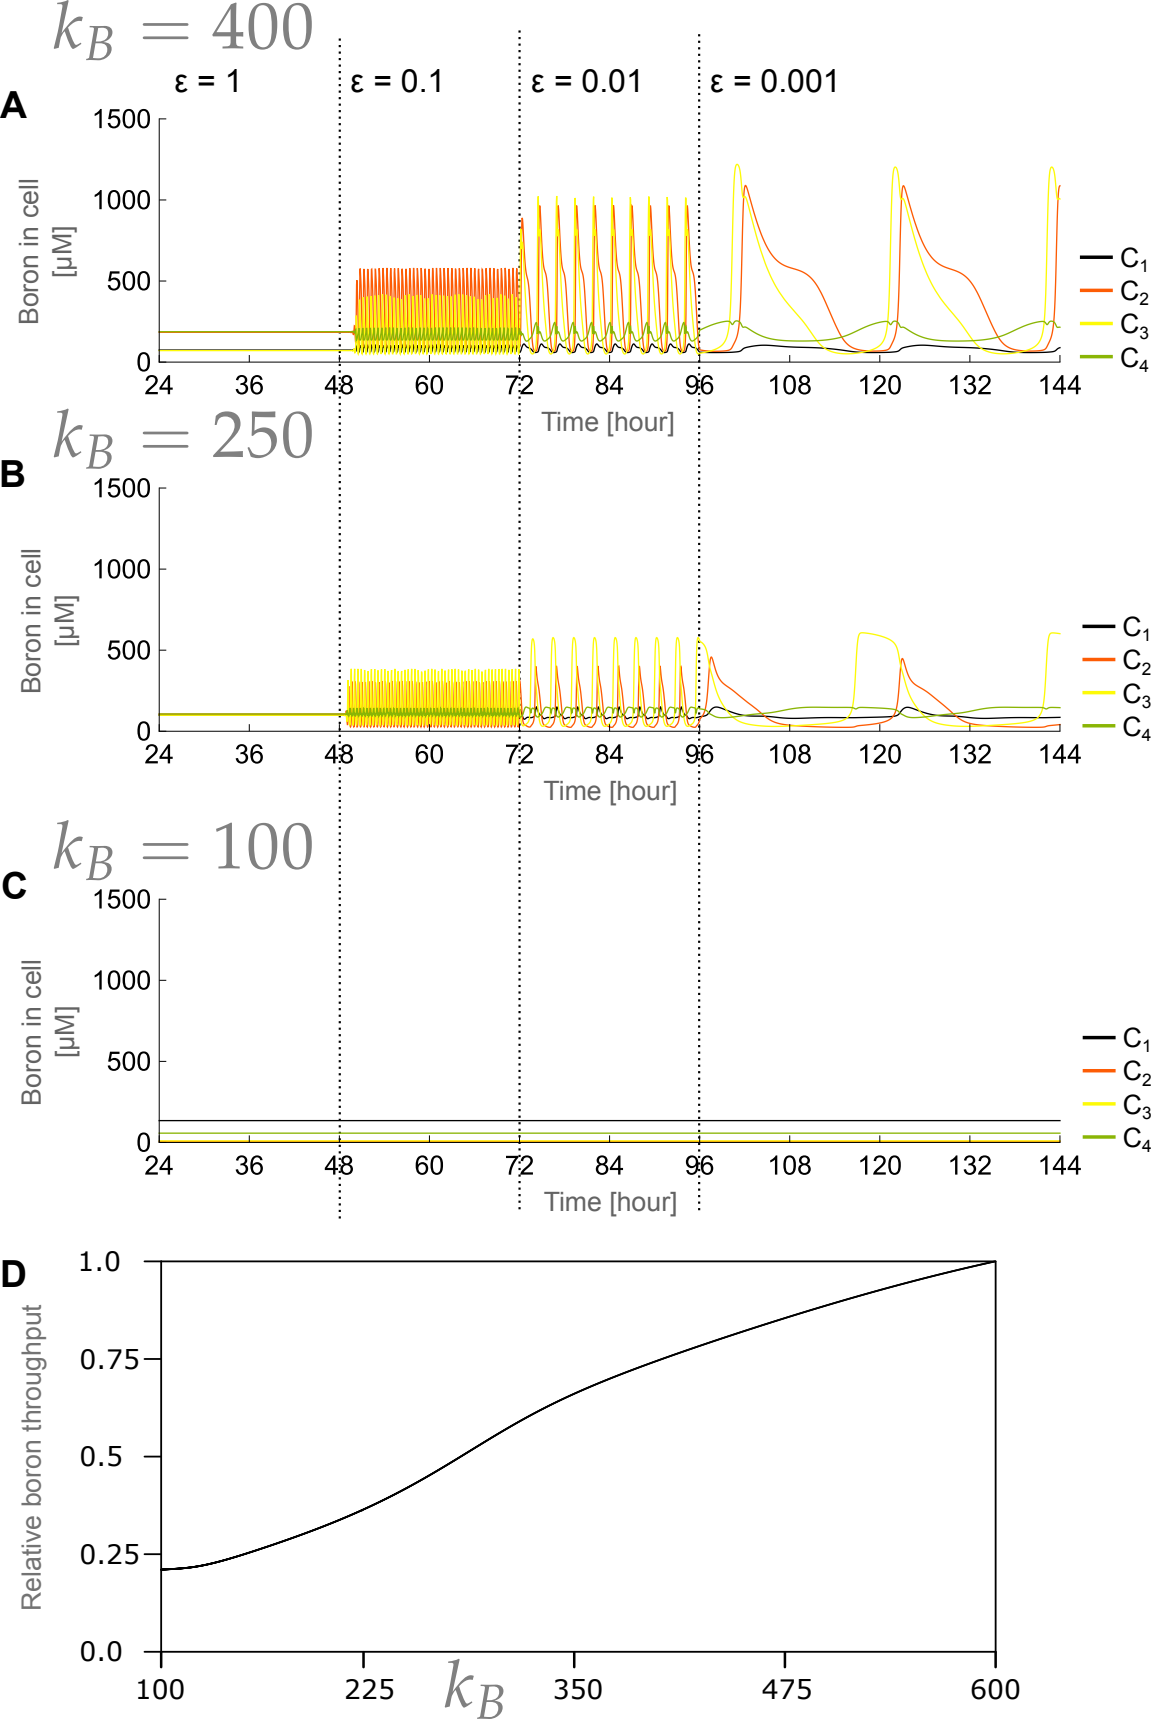

Supplement: supp [file elife_poa_e27038_Figure_2_figure_supplement_1.pdf › elife_poa_e27038_Figure_2_figure_supplement_1.pdf]

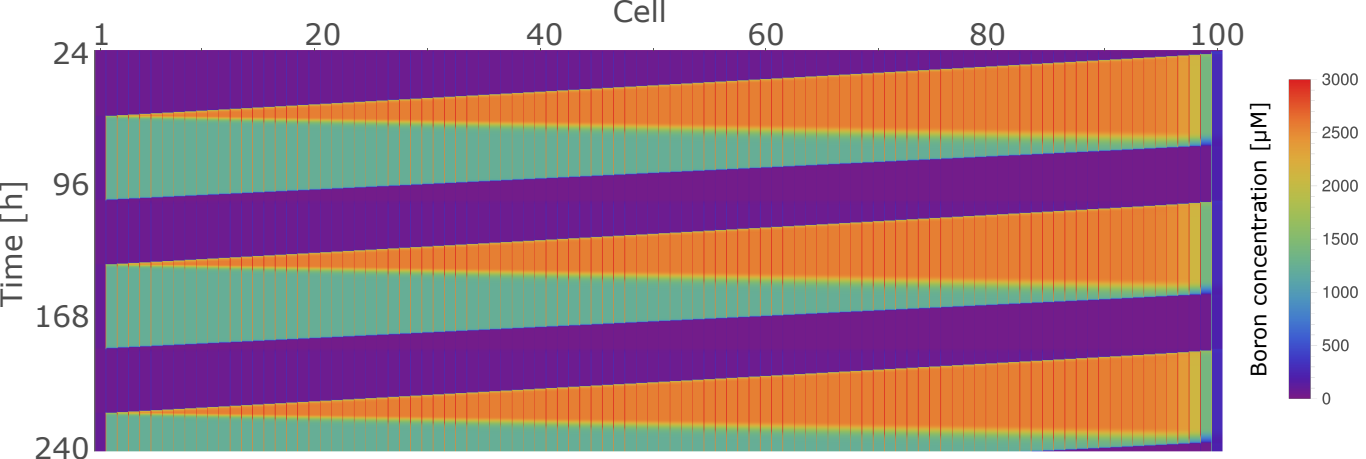

Supplement: supp [file elife_poa_e27038_Figure_3_figure_supplement_1.pdf › elife_poa_e27038_Figure_3_figure_supplement_1.pdf]

**A**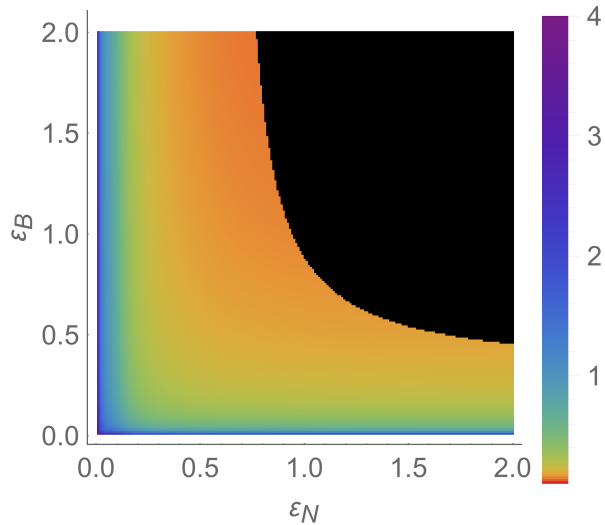**B**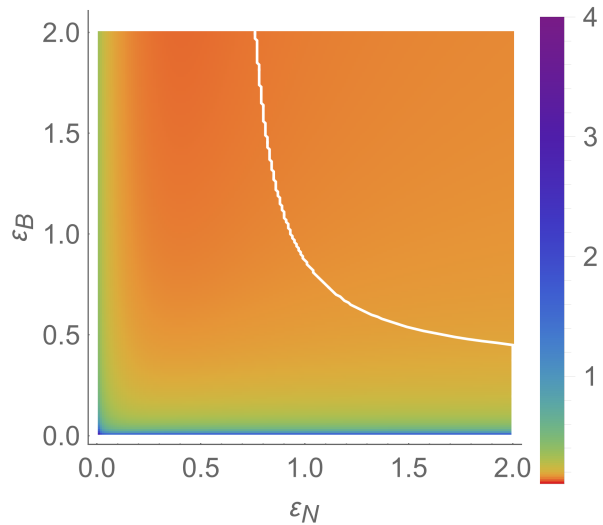

Supplement: supp [file elife_poa_e27038_Figure_4_figure_supplement_1.pdf › elife_poa_e27038_Figure_4_figure_supplement_1.pdf]

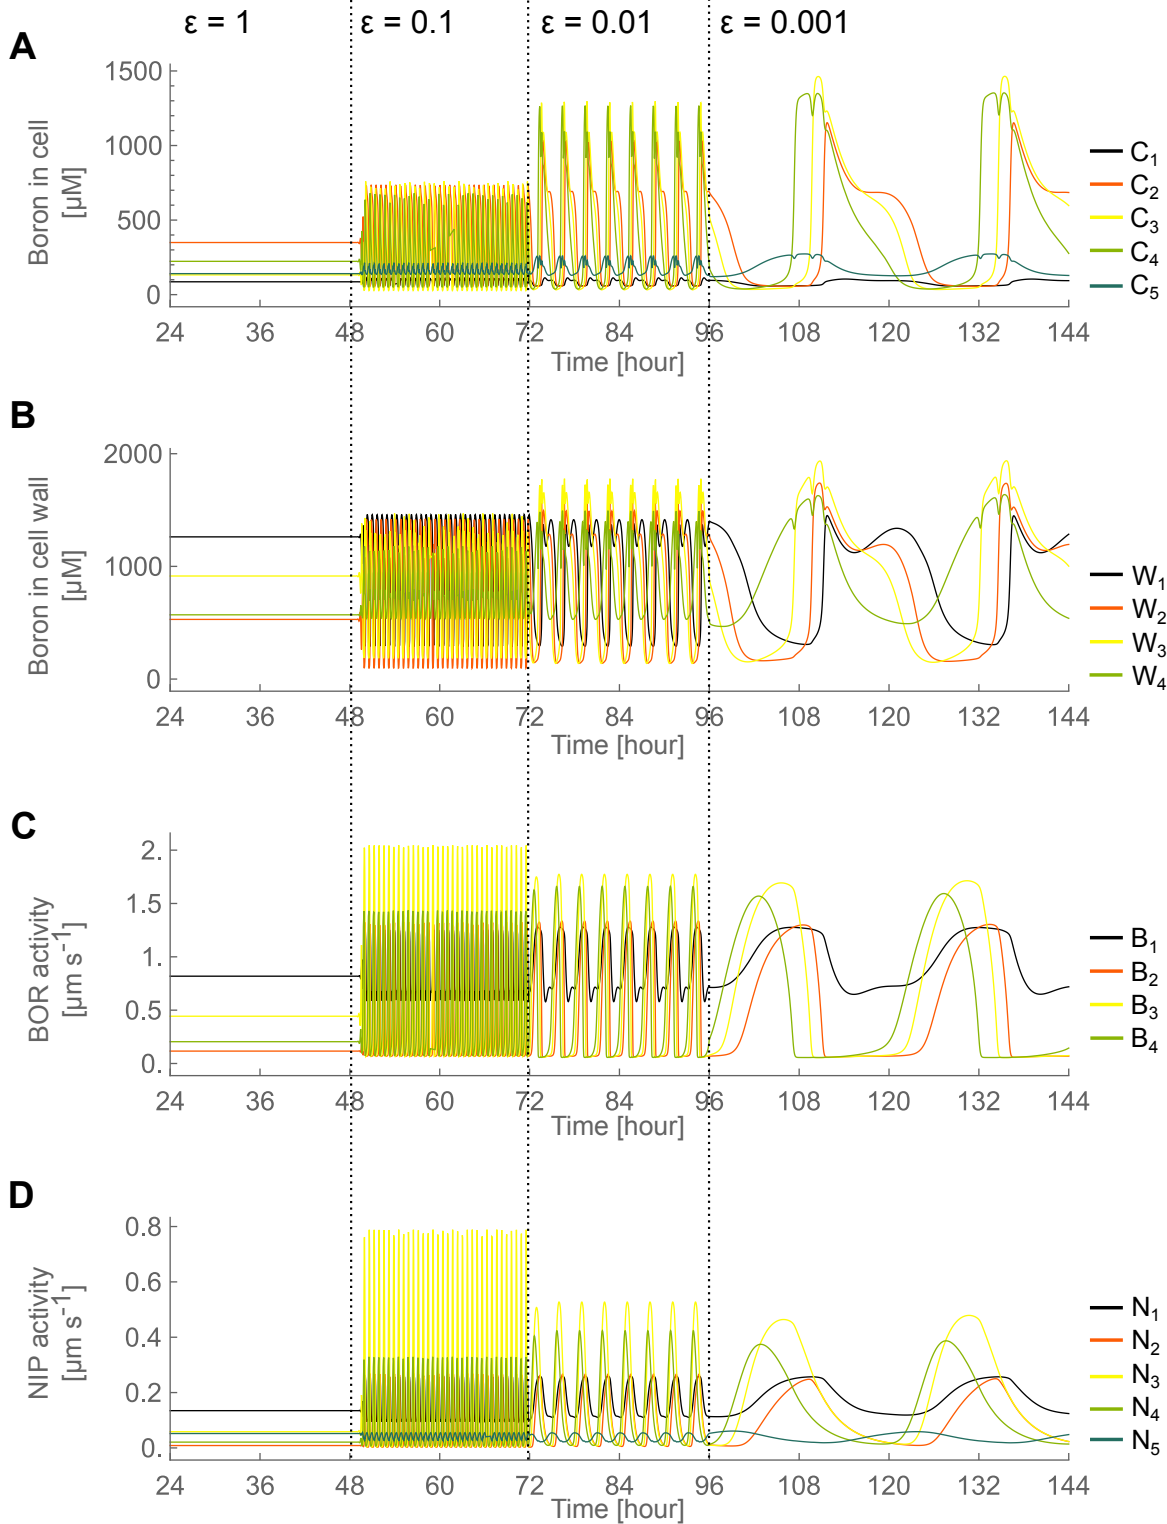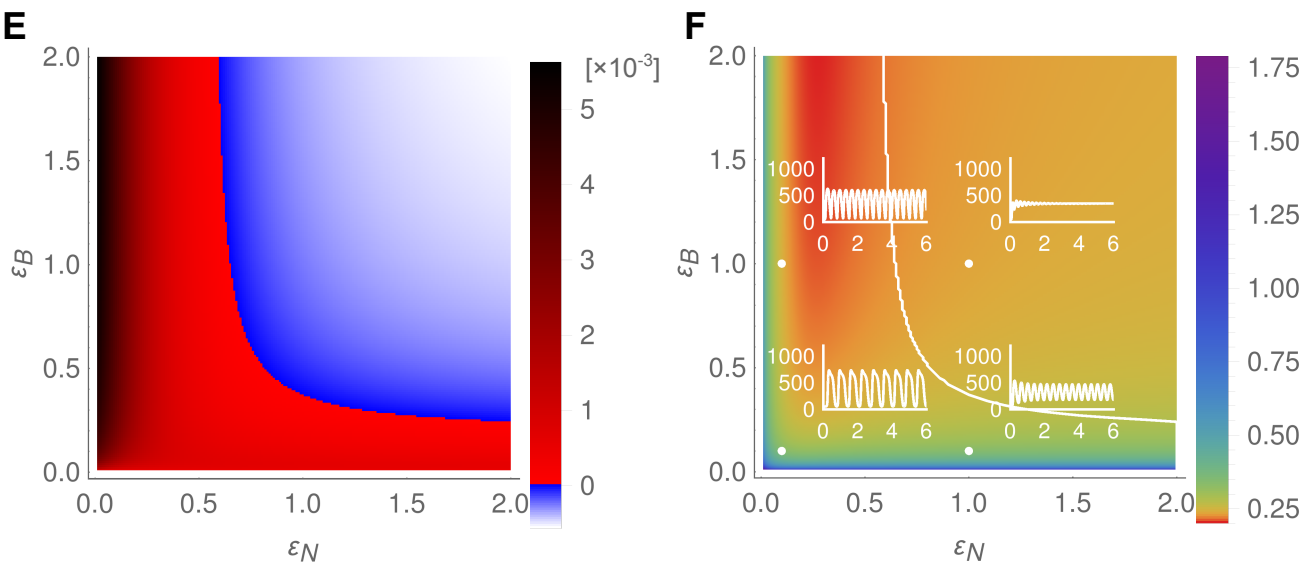

Supplement: supp [file elife_poa_e27038_Figure_4_figure_supplement_2.pdf › elife_poa_e27038_Figure_4_figure_supplement_2.pdf]

**A**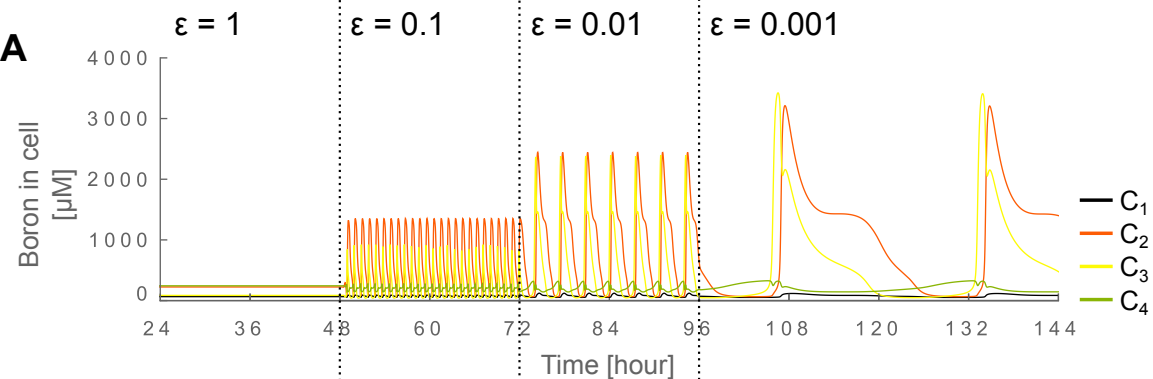**B**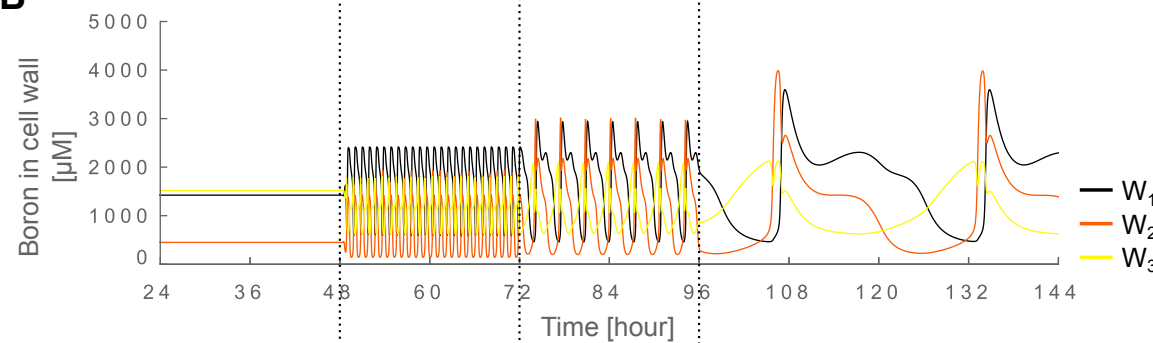**C**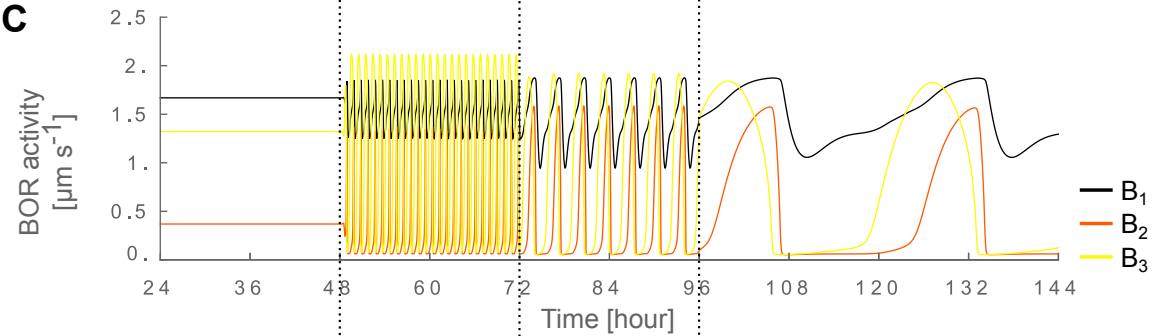**D**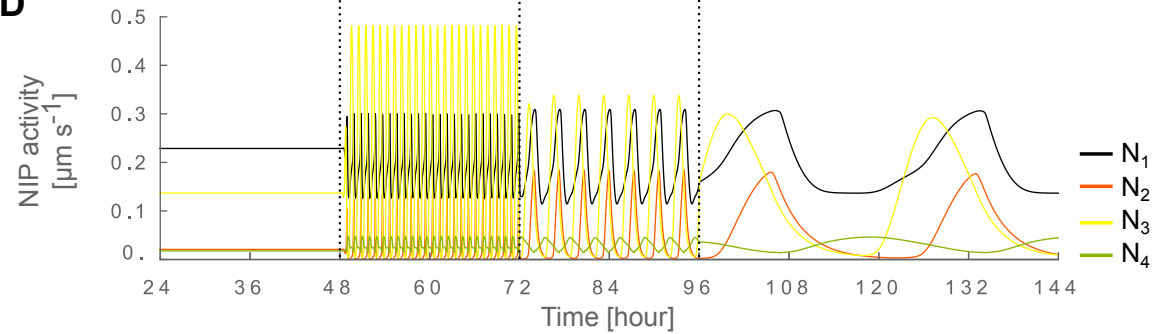

Supplement: supp [file elife_poa_e27038_Figure_4_figure_supplement_3.pdf › elife_poa_e27038_Figure_4_figure_supplement_3.pdf]

**A***NIP5;1*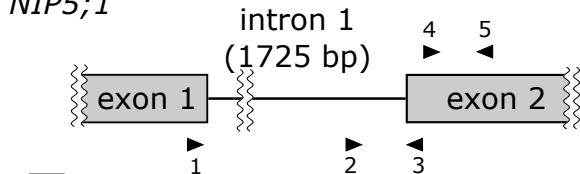

100 bp

*PP2A*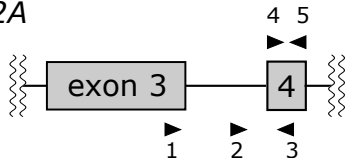**B**

mature-mRNA / pre-mRNA

ratio

200

100

0

*PP2A**NIP5;1*

\*

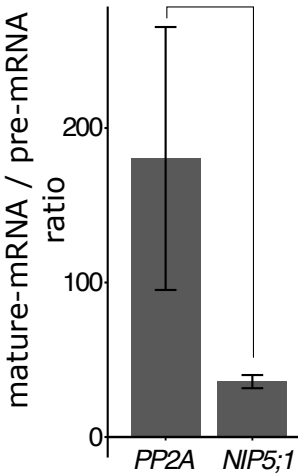

Supplement: supp [file elife_poa_e27038_Figure_7_supplement_1.pdf › elife_poa_e27038_Figure_7_supplement_1.pdf]
